# Supplementary material for: Brackish habitat dictates cultivable Actinobacterial diversity from marine sponges
Source: PubMed Central journal article supplement (PMC5503172; doi:10.1371/journal.pone.0176968), 2017-07-10
Supplement: pone.0176968.s002.pdf [file pone.0176968.s002.pdf]

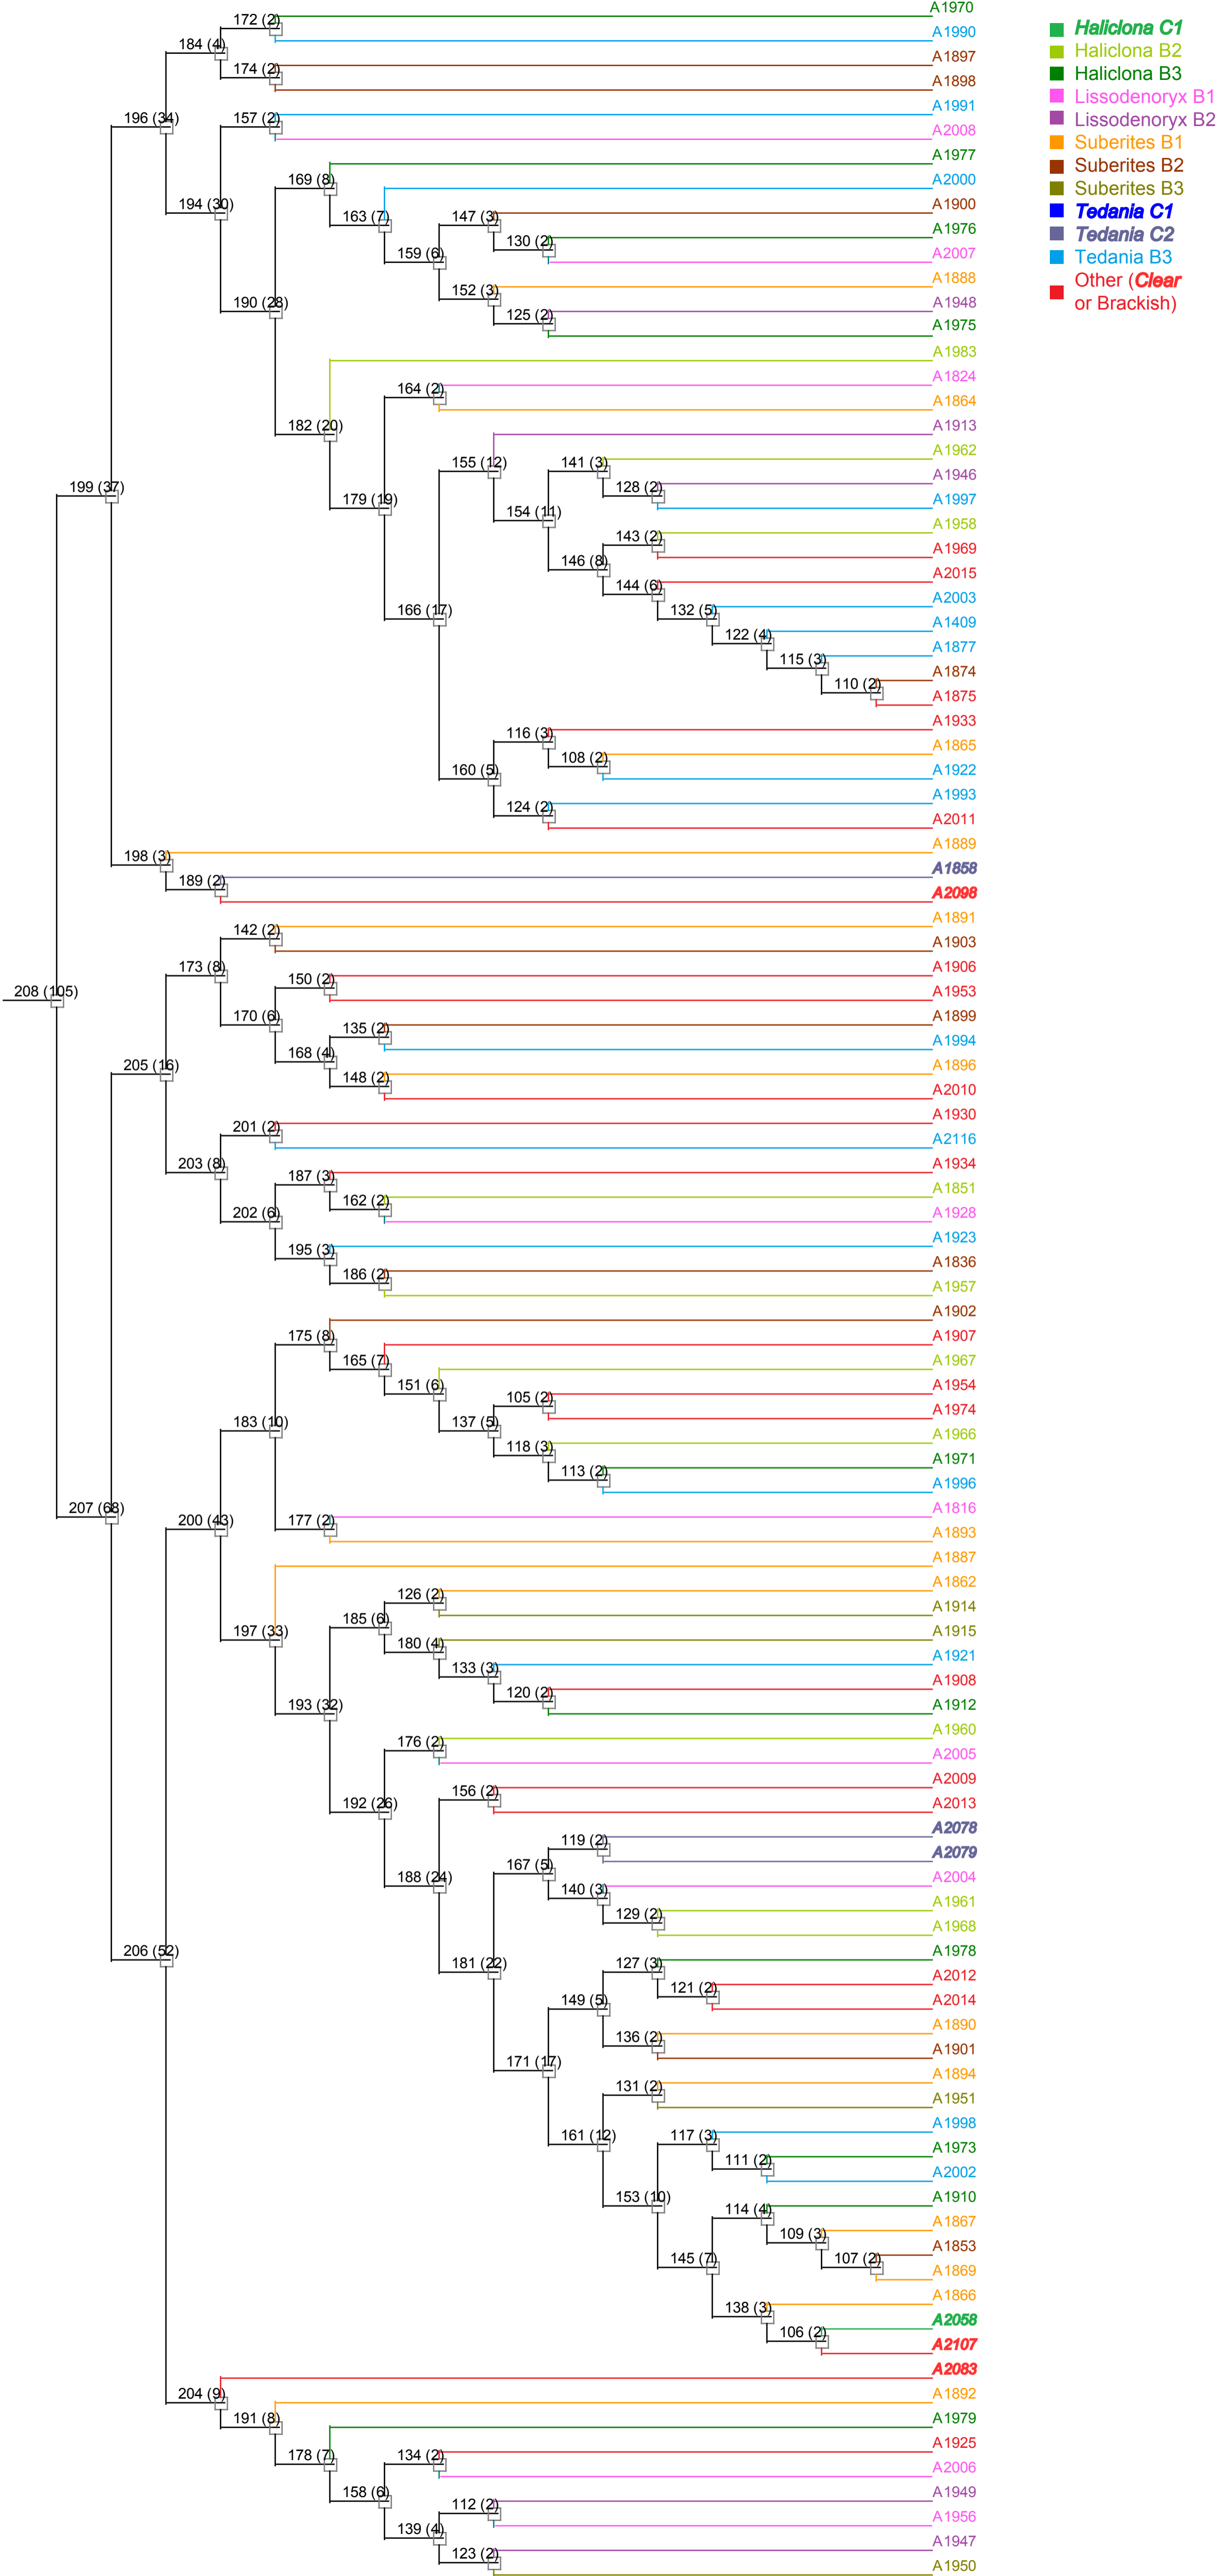

- Haliclona C1
- Haliclona B2
- Haliclona B3
- Lissodenoryx B1
- Lissodenoryx B2
- Suberites B1
- Suberites B2
- Suberites B3
- Tedania C1
- Tedania C2
- Tedania B3
- Other (Clear or Brackish)
