# Supplementary material for: Brackish habitat dictates cultivable Actinobacterial diversity from marine sponges
Source: PubMed Central journal article supplement (PMC5503172; doi:10.1371/journal.pone.0176968), 2017-07-10

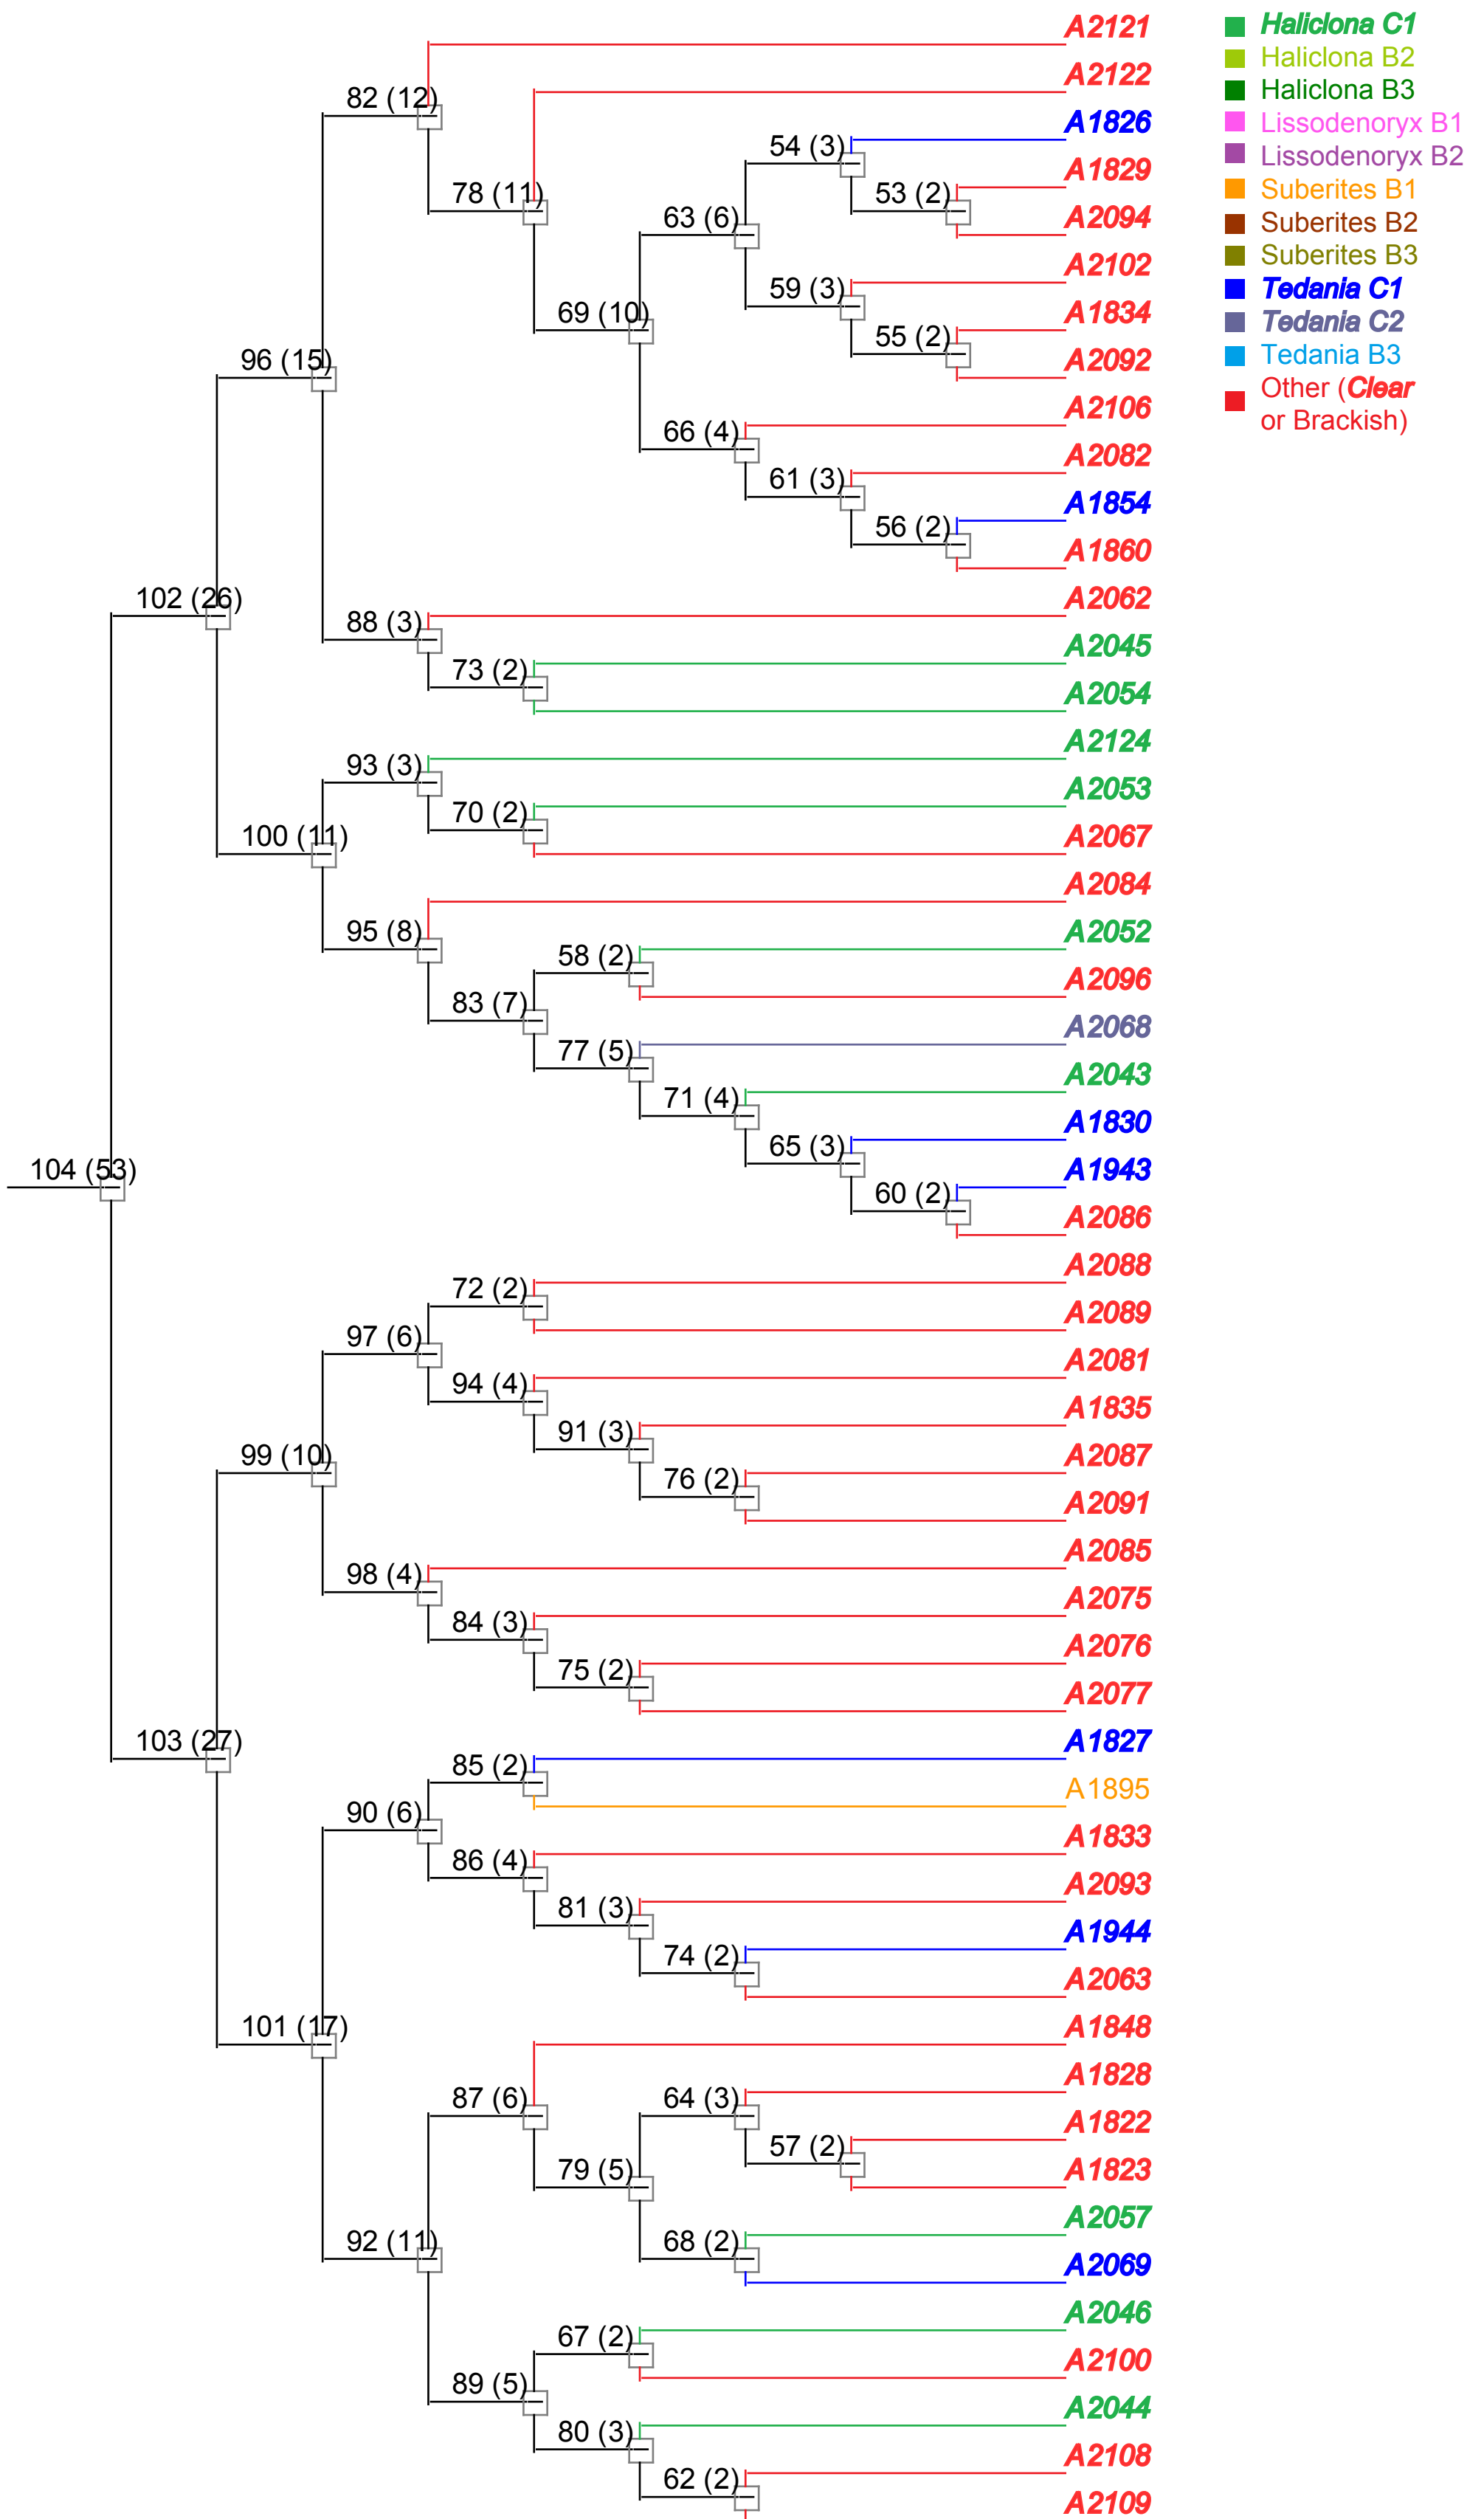

Supplement: pone.0176968.s003.pdf [file pone.0176968.s003.pdf]
